# Supplementary material for: A reference genome for pea provides insight into legume genome evolution
Source: Springer Nature journal article supplement (doi:10.1038/s41588-019-0480-1), 2019-09-01
Supplement: 41588_2019_480_MOESM4_ESM.pdf [file 41588_2019_480_MOESM4_ESM.pdf]

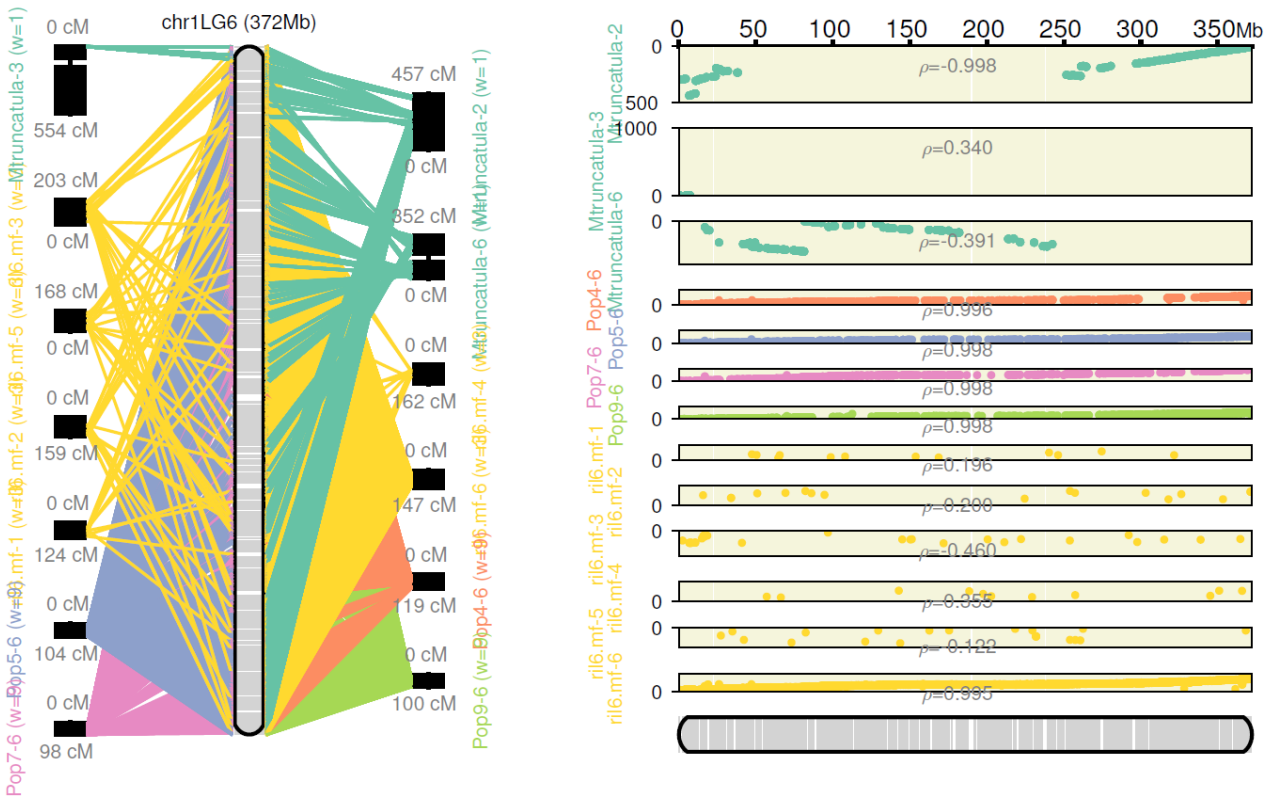

Supplementary Data 2. Alignment of 'Caméor' genome v1a pseudomolecules to linkage groups of individual genetic maps obtained for RIL Pop4, 5, 6, 9 and to *M. truncatula* v4 genome assembly, using ALLMAPS (Tang et al. 2015).

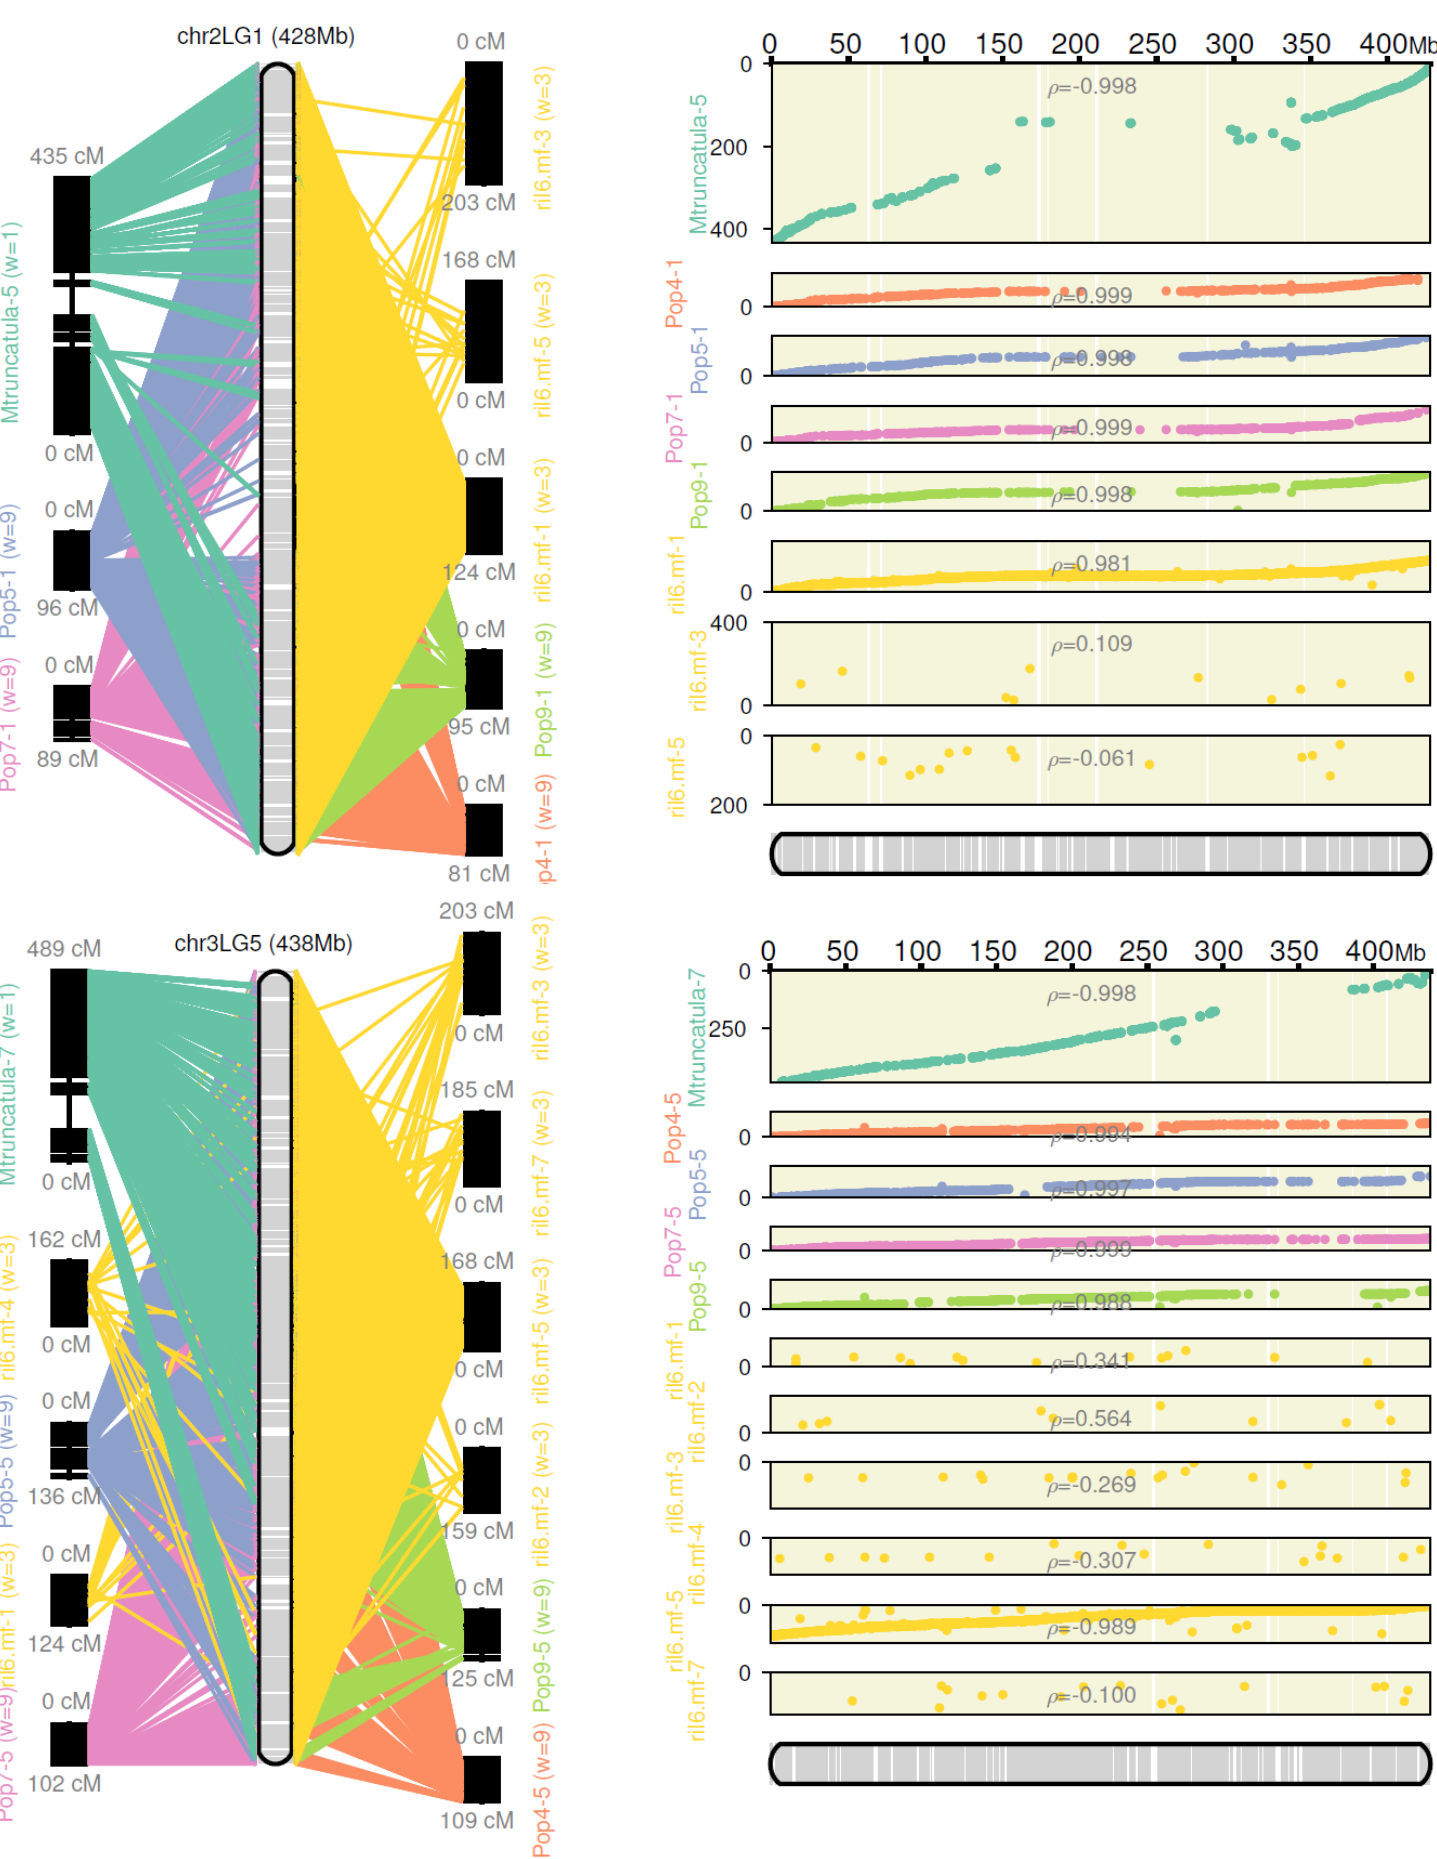

Data S2 (continued)
